# Supplementary material
Source: bioRxiv or medRxiv preprint supplement (https://www.biorxiv.org/highwire/filestream/20469/field_highwire_adjunct_files/0/074443-1.pdf)
Supplement: Supplementary file [file 074443-1.pdf]

## Extended data figures and tables

### The impact of rare variation on gene expression across tissues

Xin Li<sup>1†</sup>, Yungil Kim<sup>2†</sup>, Emily K. Tsang<sup>3†</sup>, Joe R. Davis<sup>4†</sup>, Farhan N. Damani<sup>2</sup>, Colby Chiang<sup>5</sup>, Zachary Zappala<sup>4</sup>, Benjamin J. Strober<sup>6</sup>, Alexandra J. Scott<sup>5</sup>, Andrea Ganna<sup>7,8,9</sup>, Jason Merker<sup>1</sup>, GTEx Consortium, Ira M. Hall<sup>5,10,11</sup>, Alexis Battle<sup>2\*</sup> and Stephen B. Montgomery<sup>1,4\*</sup>

<sup>1</sup> Department of Pathology, Stanford University, Stanford, CA. <sup>2</sup> Department of Computer Science, Johns Hopkins University, Baltimore, MD. <sup>3</sup> Biomedical Informatics Program, Stanford University, Stanford, CA. <sup>4</sup> Department of Genetics, Stanford University, Stanford, CA. <sup>5</sup> McDonnell Genome Institute, Washington University School of Medicine, St. Louis, MO. <sup>6</sup> Department of Biomedical Engineering, Johns Hopkins University, Baltimore, MD. <sup>7</sup> Analytic and Translational Genetics Unit, Massachusetts General Hospital, Boston, MA. <sup>8</sup> Program in Medical and Population Genetics, Broad Institute of MIT and Harvard, Cambridge, MA. <sup>9</sup> Stanley Center for Psychiatric Research, Broad Institute of MIT and Harvard, Cambridge, MA. <sup>10</sup> Department of Medicine, Washington University School of Medicine, St. Louis, MO. <sup>11</sup> Department of Genetics, Washington University School of Medicine, St. Louis, MO.

†equal contribution

\*co-corresponding authors, alphabetical

Correspondence to [ajbattle@cs.jhu.edu](mailto:ajbattle@cs.jhu.edu), [smontgom@stanford.edu](mailto:smontgom@stanford.edu)

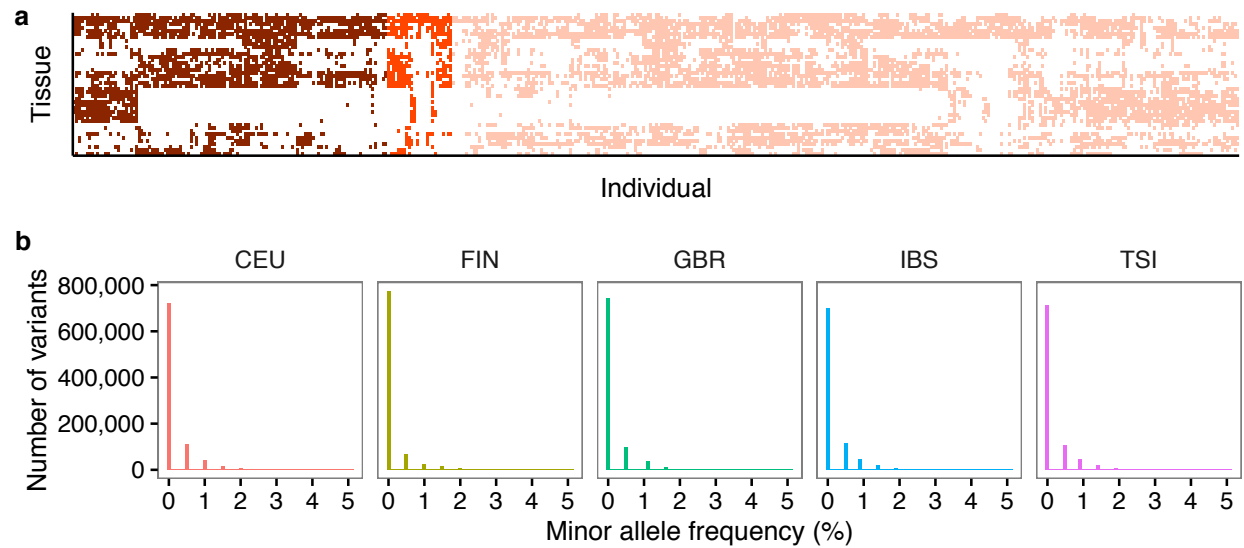

**Extended Data Figure 1. Individuals sampled for each tissue and European population allele frequencies of rare variants included in the analysis.** (a) Matrix of the 44 tissues and 449 individuals analyzed. Available tissue samples for each individual are depicted in red. The two highlighted groups of individuals on the left had whole genome sequencing data. The darker shade indicates the individuals of European descent, who were used for rare variant analyses. (b) European population allele frequency distributions in the 1000 Genomes European project of rare SNVs and indels analyzed ( $MAF \leq 0.01$  in GTEx individuals of European descent and in 1000 Genomes European super population).

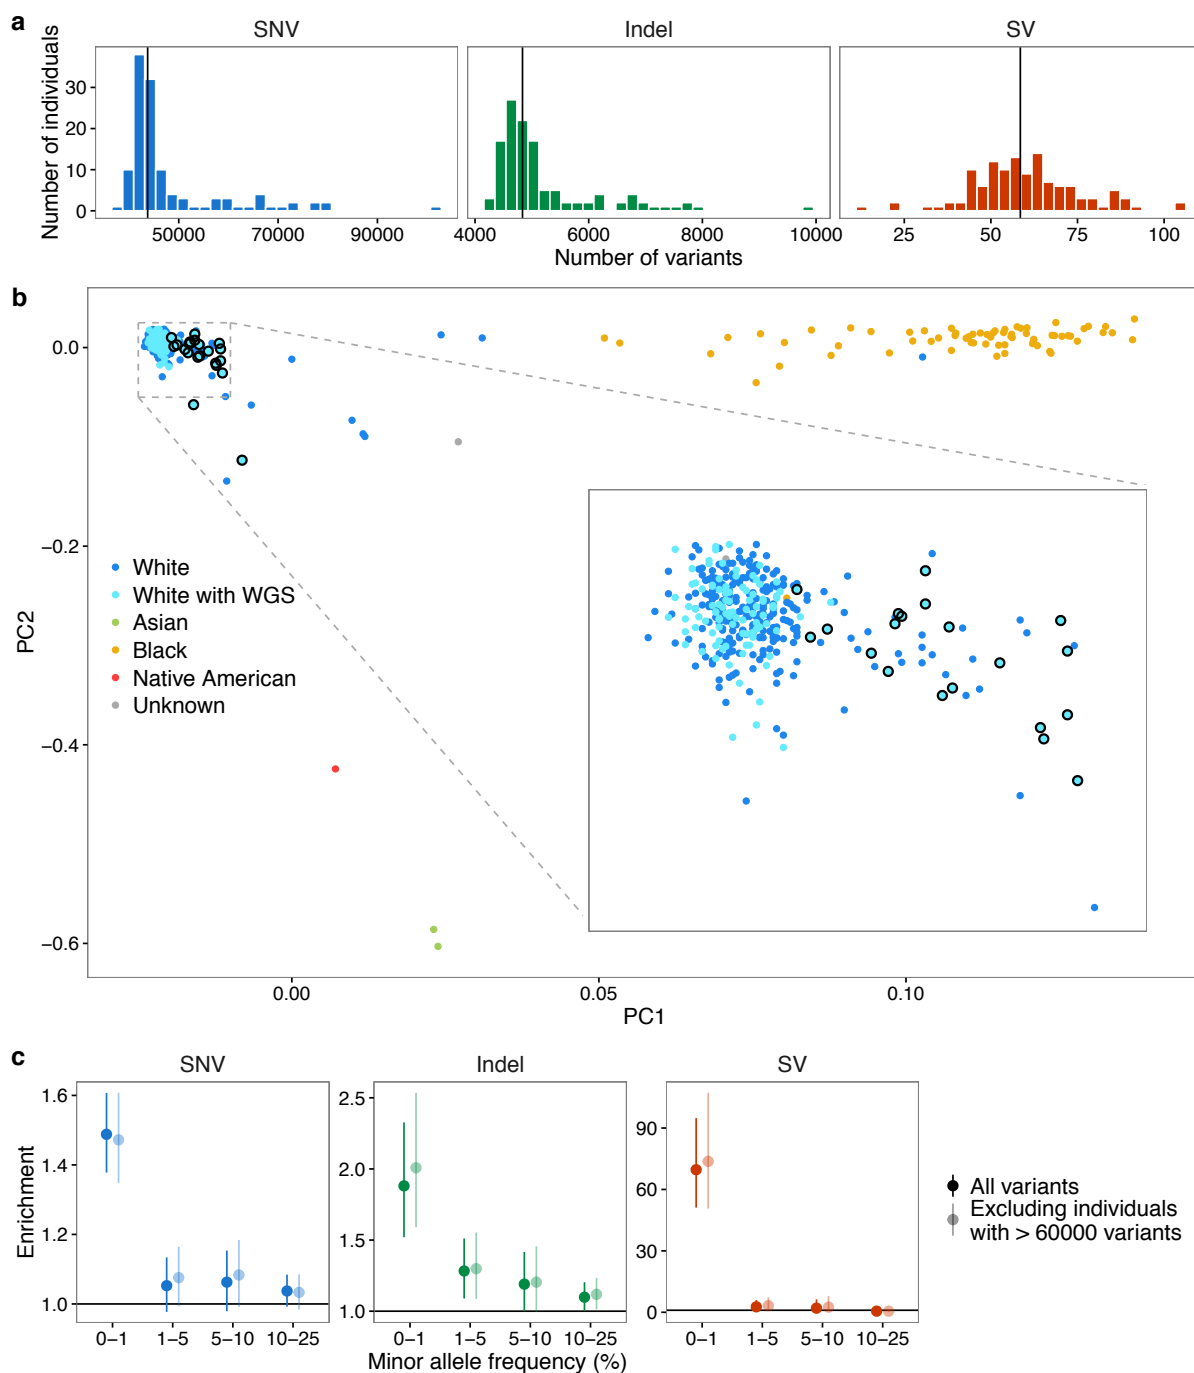

**Extended Data Figure 2. Number of rare variants per individual.** (a) The distribution of the number of variants of each type for individuals of European descent (reported as white). Certain individuals harbored many more rare variants than the population median (vertical black line). (b) Principal component analysis of all individuals. Individuals are plotted according to their first two genotype principal components (PCs) and colored by their reported ancestry. White individuals with whole genome sequencing data, included in (a), are colored in a lighter shade of blue and those with 60,000 or more rare variants are circled in black. The individuals with an excess of rare variants likely had African or Asian admixture. (c) Removing individuals with an excess of rare variants (circled in (b)) did not substantially affect the enrichment patterns.

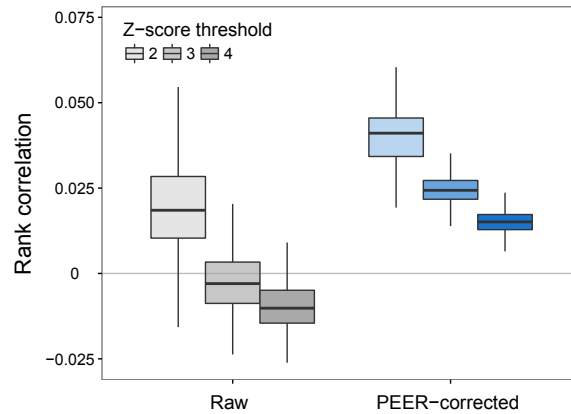

**Extended Data Figure 3. PEER correction improves replication of outliers across tissues.**

Spearman rank correlation between outlier status in a set of four discovery tissues and the absolute expression in a replication tissue. We tested this correlation for three discovery |median Z-score| thresholds. We used each of the 27 tissues with at least 100 European individuals as a replication tissue and randomly selected four other tissues as the discovery set. We randomly sampled  $10^5$  individual and gene pairs. The same sets of tissues and individual and gene pairs were used for predicting outliers with both raw and PEER-corrected data.

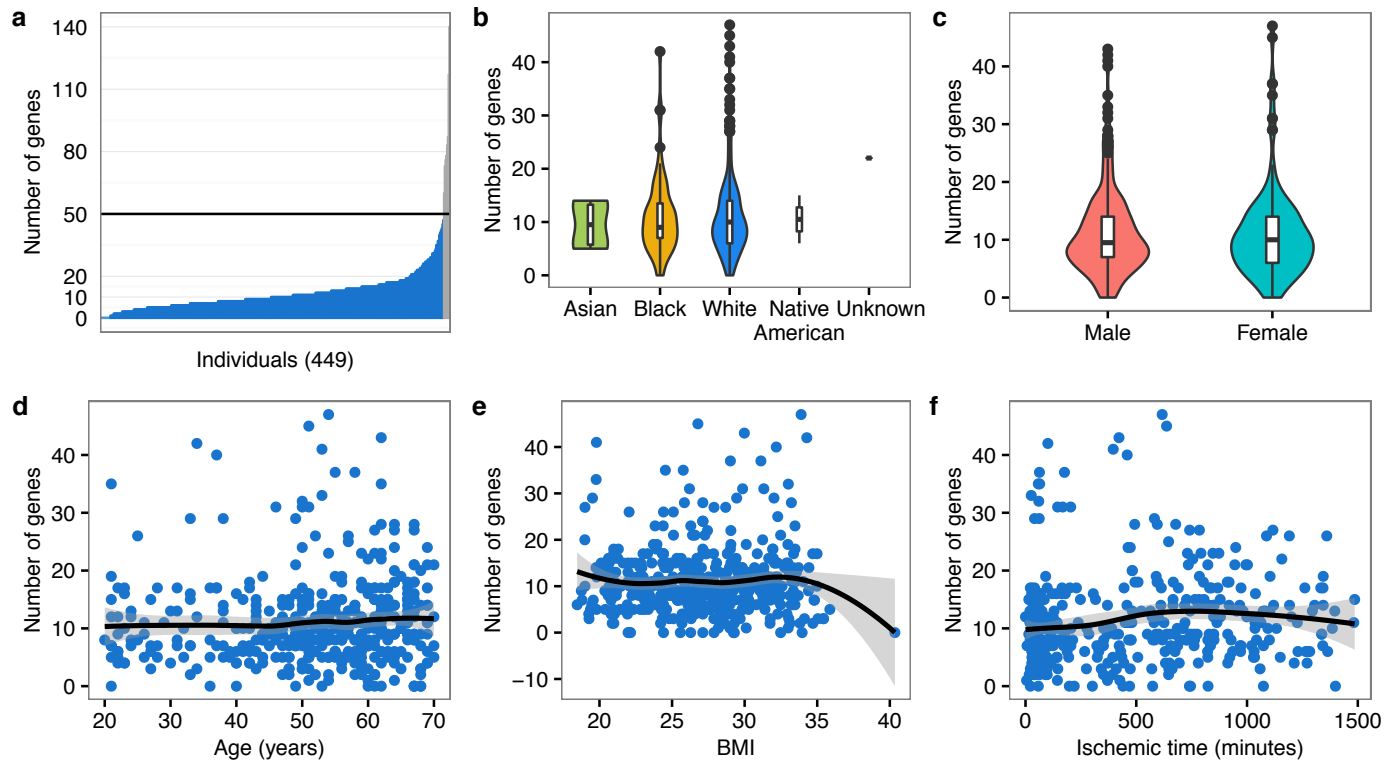

**Extended Data Figure 4. Distribution of the number of genes with a multi-tissue outlier.**

(a) Distribution of the number of genes for which each individual was a multi-tissue outlier. Each individual was an outlier for a median of 10 genes. Individuals with 50 or more outliers are colored in grey and were excluded from downstream analyses as they may be driven by environmental or other non-genetic factors. (b–f) Distribution of the number of genes for which individuals, stratified by common covariates (race, sex, age, body mass index, and ischemic time), were multi-tissue outliers. For race and sex, we compared the distributions using an unsigned Wilcoxon rank sum test, while for the remaining covariates we used Spearman's  $\rho$  to test for association. Only age (Spearman's  $\rho = 0.101$ ,  $P = 0.0333$ ) and ischemic time (Spearman's  $\rho = 0.175$ ,  $P = 0.000217$ ) were nominally associated with the number of outlier genes per individual. The association with age fails to achieve significance after correcting for multiple testing using the Bonferroni method. Note that in (b) we only tested for a significant difference in the distribution of the number of outlier genes between White and Black individuals because there were too few individuals in the other groups.

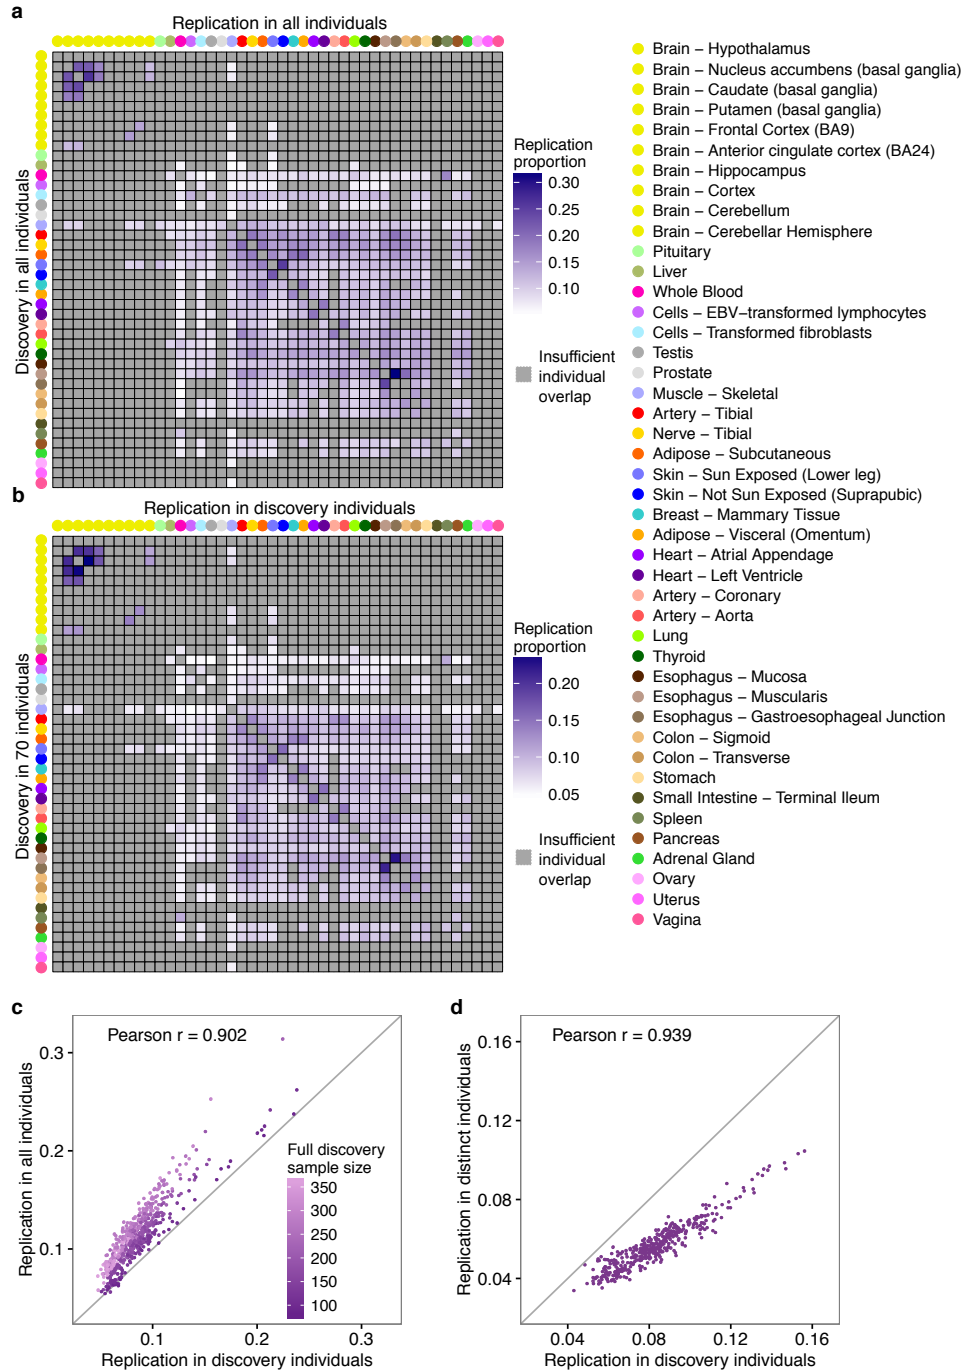

**Extended Data Figure 5. Single-tissue outlier replication controlling for individual overlap in the discovery and replication sets.** (a) Single-tissue outlier discovery and replication using all individuals, as in Fig. 1b, but data are only shown for pairs with at least 70 overlapping individuals. (b) For each pair of tissues with sufficient samples, outlier discovery and replication using only a set of 70 individuals that were sampled in both tissues. (c) Correlation between the replication values obtained from all samples and from a subset of 70 overlapping individuals per tissue pair. The replication rates decreased more when restricting to 70 individuals for discovery tissues with more samples in the full data set. (d) Correlation between replication in the 70 individuals used for discovery and replication assessed in a set of 70 individuals that included the outlier individual and 69 individuals excluded from the discovery set.

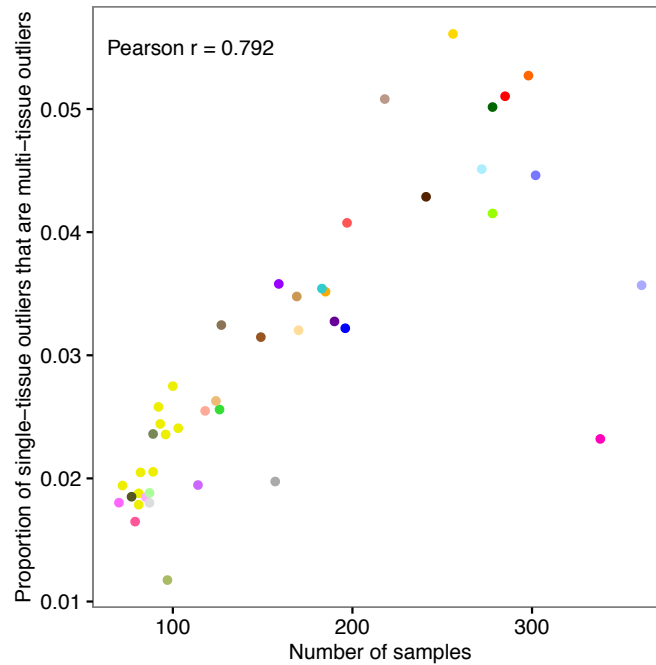

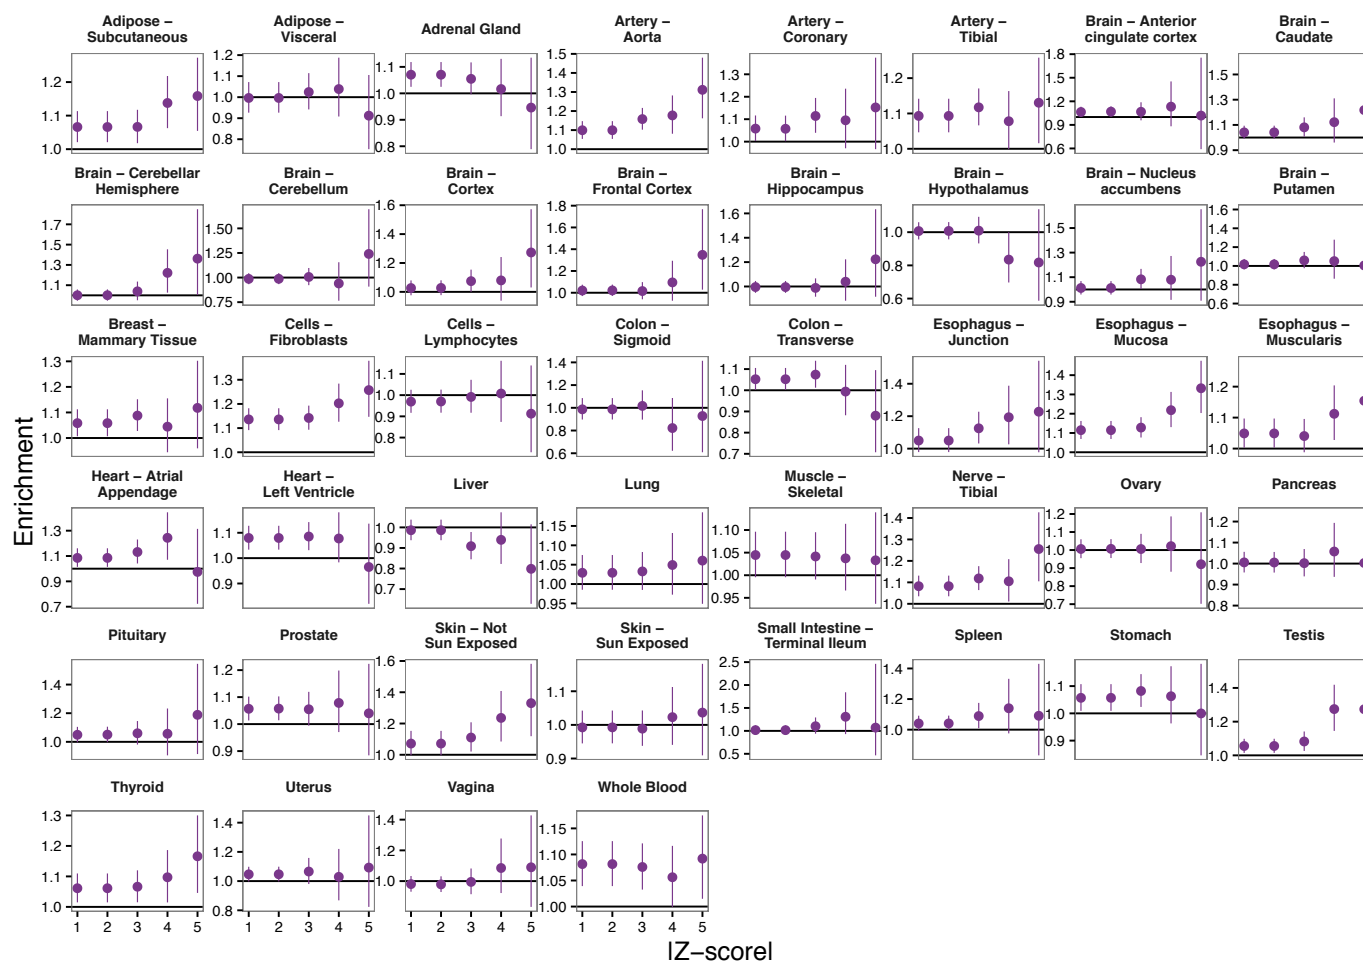

**Extended Data Figure 7. Enrichment of rare variants in single-tissue outliers.** For each tissue, rare SNV enrichment near genes with outliers in outlier compared with non-outlier individuals at increasing |Z-score| thresholds. Enrichments calculated as in Fig. 2. The rare variant enrichments varied between tissues though the overall pattern mirrored that of multi-tissue outliers when combining all the tissues (Fig. 2b). The high variance in the enrichments underscores the noise in single-tissue outlier discovery.



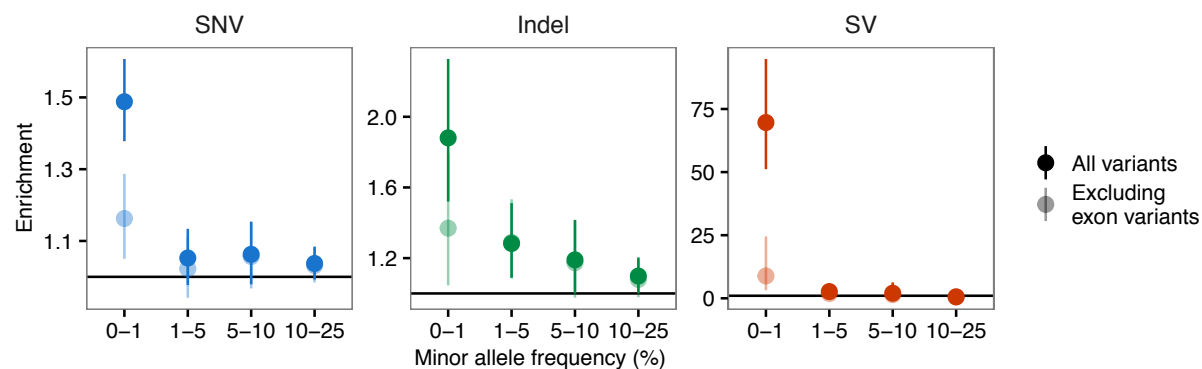

**Extended Data Figure 8. Enrichment of rare variants when excluding exonic regions.** As in Fig. 2a, enrichment of SNVs, indels, and SVs for outliers compared with the same genes in non-outliers either including all rare variants or excluding those overlapping protein-coding or lincRNA exons in Gencode v19 annotation. The enrichment of rare variants was weaker, but still significant, for all variant types when excluding exonic regions. The decreased enrichment was most striking for structural variants.

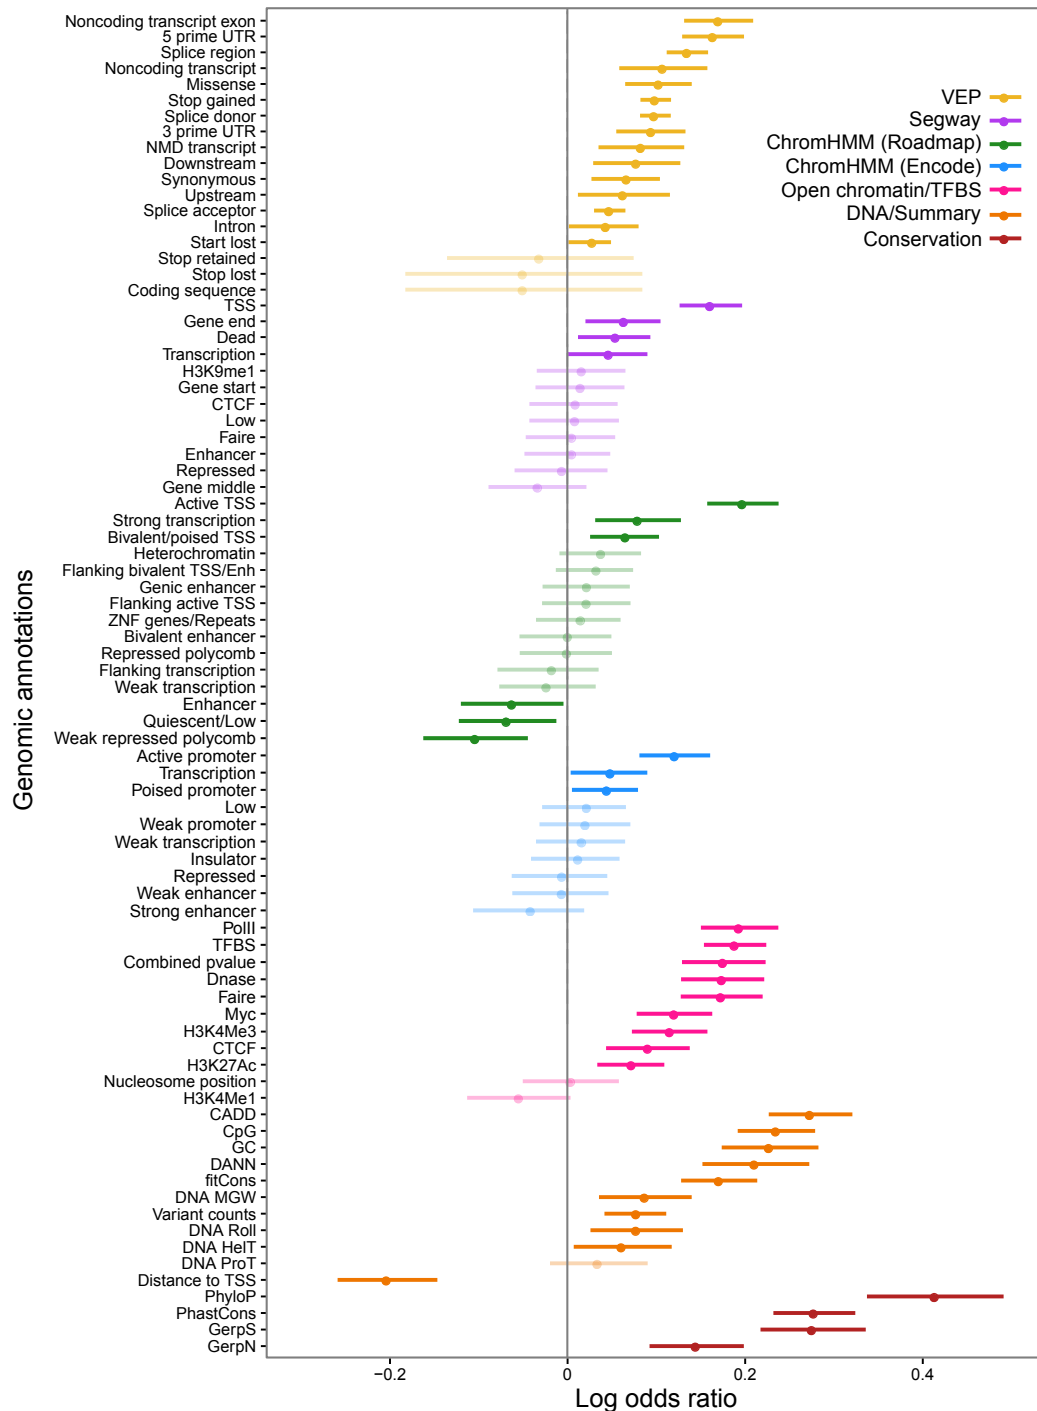

**Extended Data Figure 9. Enrichment of functional genomic annotations among an expanded set of multi-tissue outliers.** For outliers discovered with  $|\text{median Z-score}| \geq 1.5$  and allowing multiple outliers per genes, we calculated log odds ratios and 95% Wald confidence intervals from univariate logistic regressions modeling outlier status as a function of each genomic feature. When more than one feature corresponded to the same genomic annotation (e.g. the number or the presence of rare variants in a splice region; Extended Data Table 3), the feature with the highest enrichment is shown. Lighter shading indicates a non-significant log odds ratio (nominal  $P > 0.05$ ).

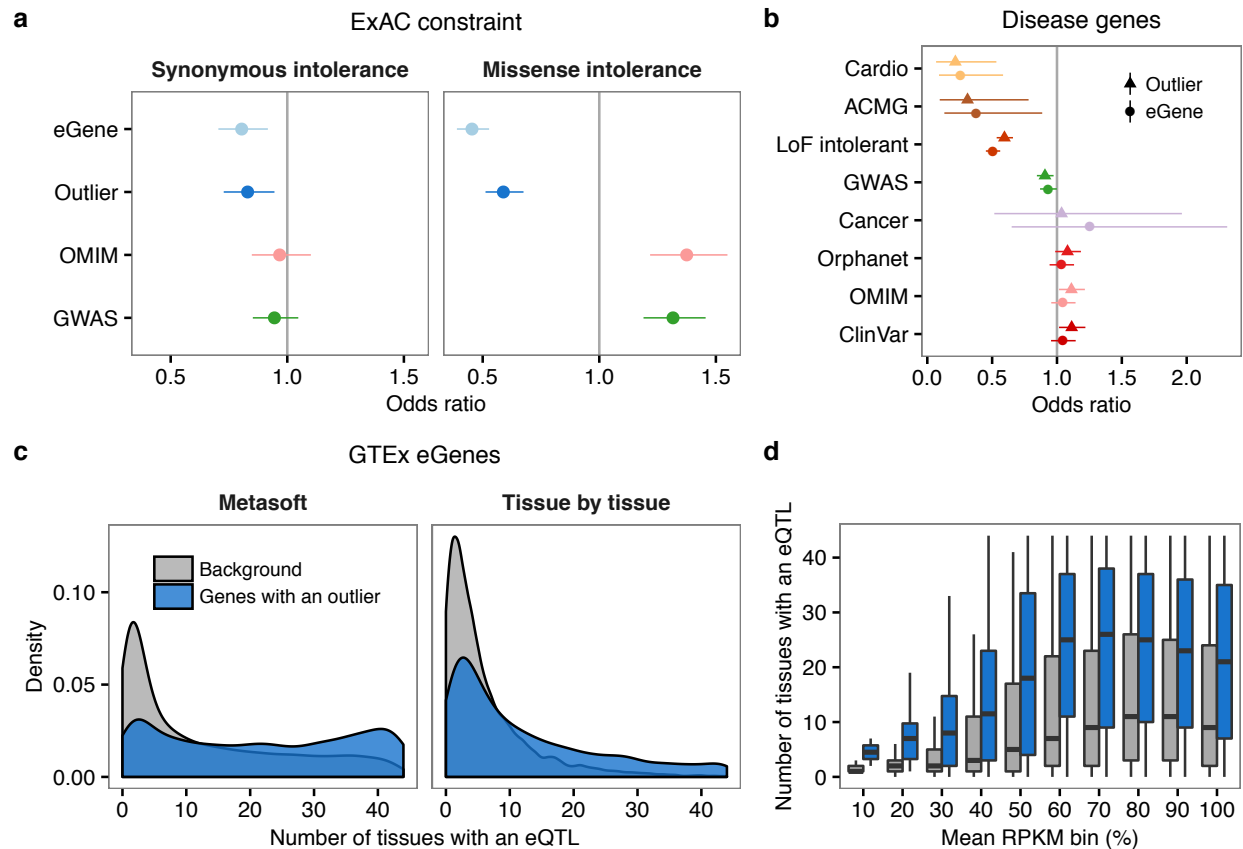

**Extended Data Figure 10. Evolutionary constraint and regulatory control of multi-tissue outlier genes.** (a) Odds ratio of being intolerant to synonymous and missense variants for genes with multi-tissue outliers, eGenes, GWAS and OMIM genes. We used scores of synonymous and missense constraint provided by ExAC. As expected, GWAS and OMIM genes showed no enrichment or depletion for synonymous variation intolerant genes (synonymous Z-score above the 90<sup>th</sup> percentile). Genes with multi-tissue outliers and eGenes showed slight depletion for these genes. In contrast, genes with multi-tissue outliers and eGenes were strongly depleted for missense variation intolerant genes (missense Z-score above the 90<sup>th</sup> percentile) compared to OMIM and GWAS genes. (b) Comparison of the depletion of disease and loss-of-function (LoF) intolerant genes among genes with a multi-tissue outlier and eGenes. (c) Distribution of the number of tissues with an eQTL for genes with and without outliers. Genes with multi-tissue outliers had eQTLs in more tissues than genes without, which suggests that they are more susceptible to shared regulatory control. This result held whether we defined shared eQTLs with Metasoft (21 vs 6 tissues, Wilcoxon rank sum test  $P < 2.2 \times 10^{-16}$ ) or through a tissue-by-tissue analysis (7 vs 3 tissues,  $P < 2.2 \times 10^{-16}$ ). (d) This eGene enrichment was robust for different mean expression levels (RPKM) across tissues. The comparison between genes with and without outliers was nominally significant for all RPKM deciles (two-sided Wilcoxon rank sum tests,  $P < 0.05$ ). Only the lowest decile was no longer significant after Bonferroni correction (all other  $P < 5.74 \times 10^{-13}$ ).

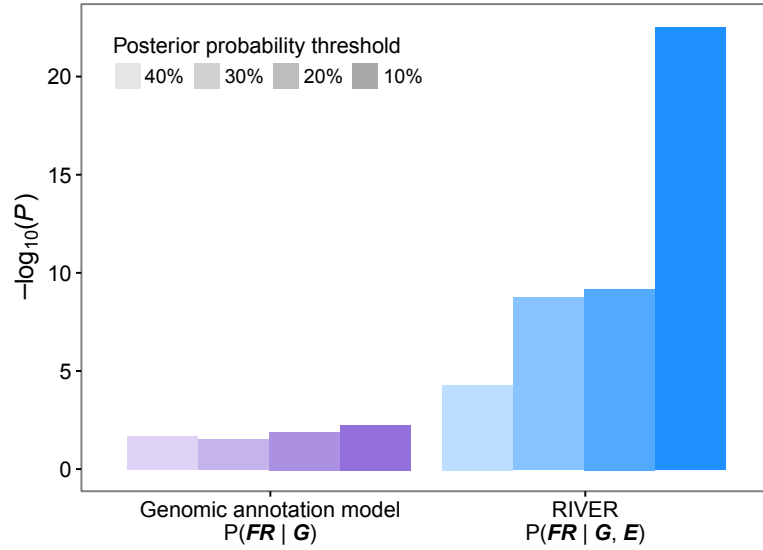

**Extended Data Figure 11. RIVER scores were strongly associated with ASE.**  $P$ -values from Fisher's exact test measuring the association between allelic imbalance and the posterior probability of a functional rare variant according to two models. We used four thresholds on the posterior probabilities (top 10%, 20%, 30% and 40%) from the two models. We evaluated ASE as the median across tissues of the absolute difference between the reference allele ratio and 0.5. We considered ASE in the top 10% of the empirical distribution to be allelic imbalance.

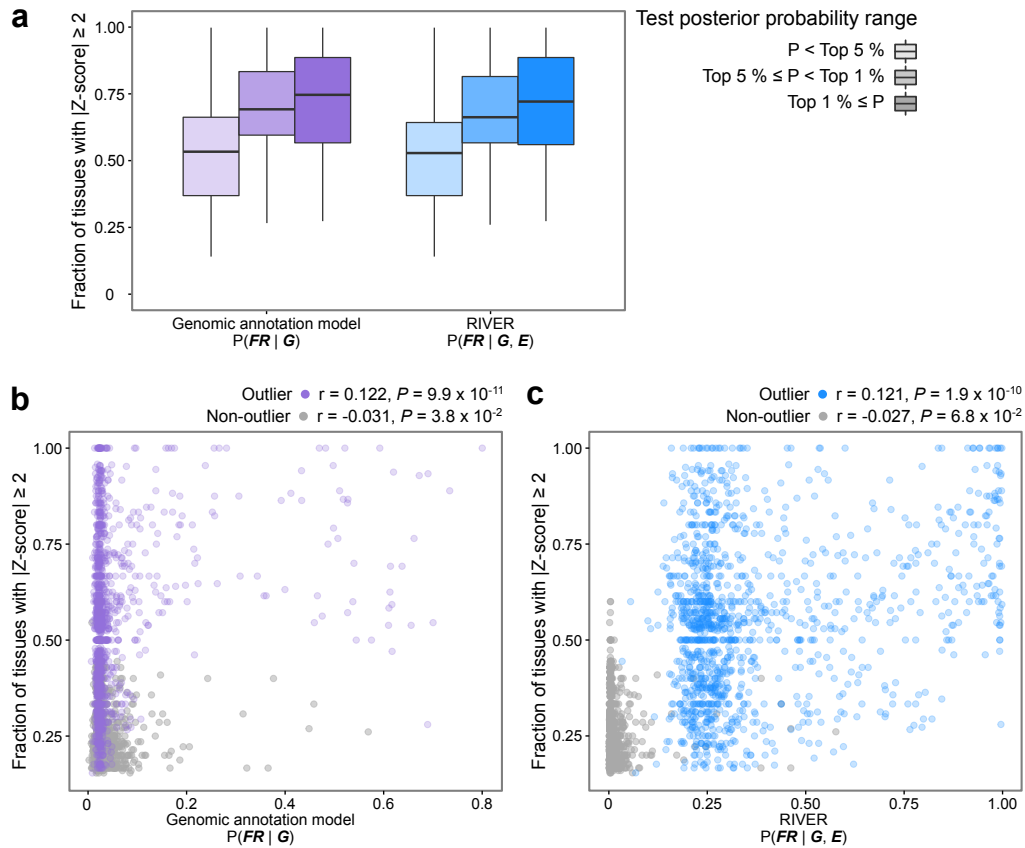

**Extended Data Figure 12. The fraction of tissues with  $|Z\text{-score}| \geq 2$  in multi-tissue outliers was correlated with the posterior probability of a functional rare variant.** (a) The fraction of tissues with  $|Z\text{-score}| \geq 2$  for three groups of multi-tissue outliers defined using thresholds on the test posterior probability of a functional rare variant. (b,c) Correlations, using Kendall's tau, between the fraction of tissues with  $|Z\text{-score}| \geq 2$  and the test probabilities from the genomic annotation model (b) and RIVER (c). We considered multi-tissue outliers and non-outliers separately for each model and calculated test posterior probabilities using 10-fold cross validation. Only individual and gene pairs with a fraction of tissues with  $|Z\text{-score}| \geq 2$  that was significantly different from 0.05 were considered (one-sided binomial exact test, Benjamini-Hochberg adjusted  $P < 0.05$ ).

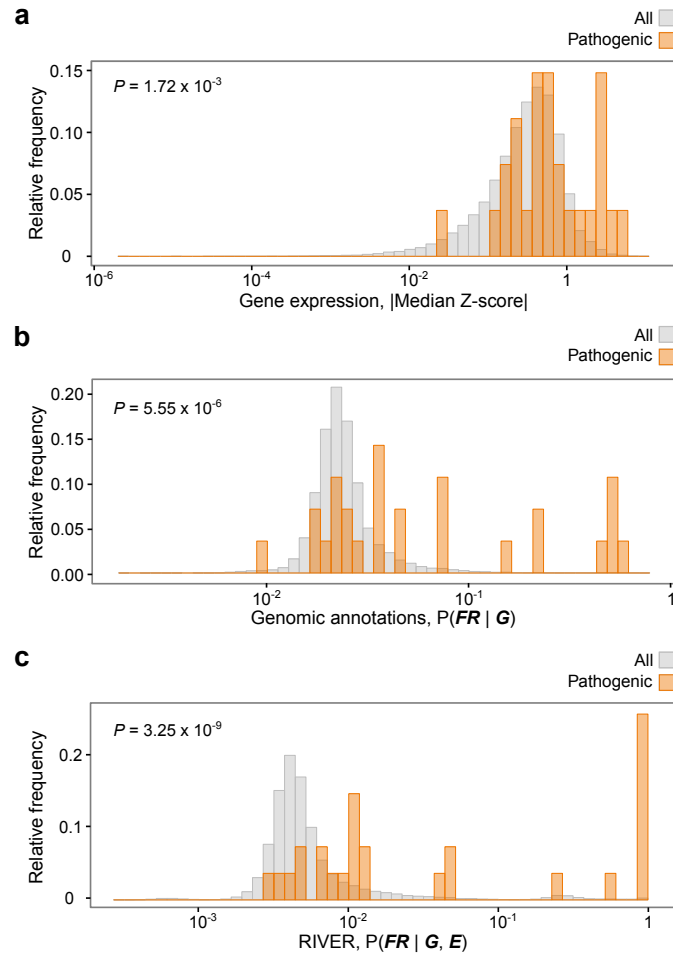

**Extended Data Figure 13. Distributions of predictive scores for 27 individual and gene pairs with pathogenic variants compared to all variants.** Relative frequency of (a) the |median Z-score|, (b) posterior probabilities from the genome annotation only model, and (c) posterior probabilities from RIVER for all individual and gene pairs (grey) and 27 pairs with pathogenic variants from ClinVar (orange).  $P$ -values were computed using a two-sided Wilcoxon rank sum test.

**a**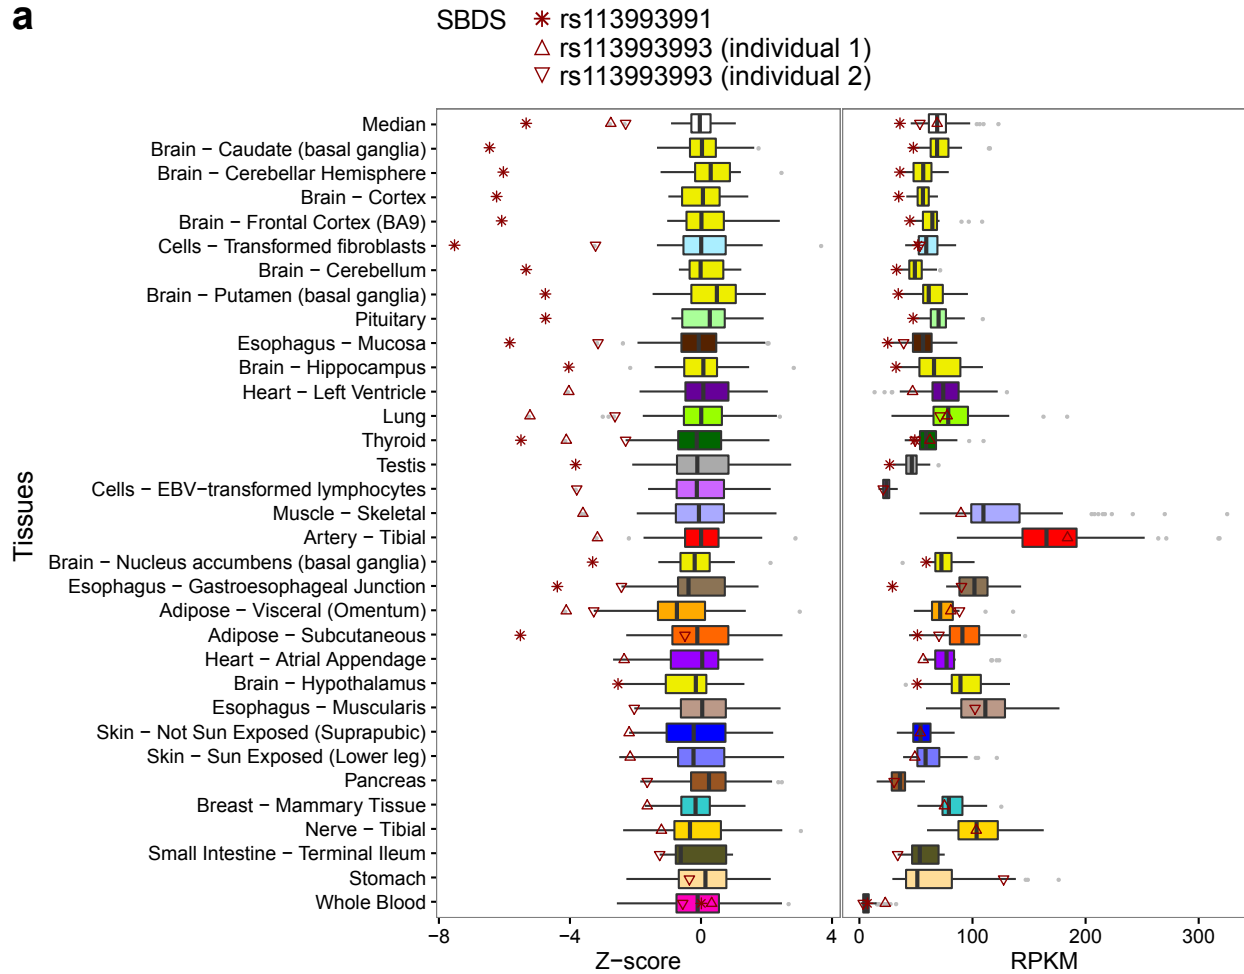**b**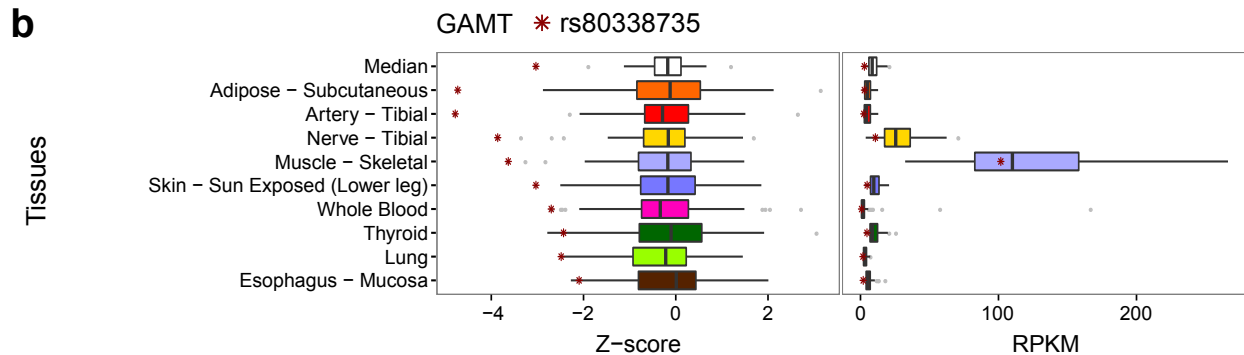

**Extended Data Figure 14. Expression levels for genes proximal to pathogenic variants.** Z-score and RPKM distributions for (a) *SBDS* and (b) *GAMT* were compared to the values for four individuals carrying regulatory pathogenic variation (red asterisks and triangles). Three individuals carrying a total of two unique rare variants are shown for *SBDS*; one individual carrying one rare variant is shown for *GAMT*. The median Z-score and RPKM values across tissues are shown at the top of each plot. Tissues are sorted in decreasing order of the difference between the average Z-score of individuals with a regulatory pathogenic variant and the median Z-score for the tissue.

| Feature Name                | Type    | Description                                                                                                            | Source              |
|-----------------------------|---------|------------------------------------------------------------------------------------------------------------------------|---------------------|
| Duplication                 | binary  | Presence of a rare duplication SV                                                                                      | Chiang et al.       |
| CNV                         | binary  | Presence of a rare CNV                                                                                                 | Chiang et al.       |
| Deletion                    | binary  | Presence of a rare deletion SV                                                                                         | Chiang et al.       |
| Breakend                    | binary  | Presence of a rare breakend SV                                                                                         | Chiang et al.       |
| Inversion                   | binary  | Presence of a rare inversion SV                                                                                        | Chiang et al.       |
| Splice                      | binary  | Presence of a splice region, acceptor or donor variant                                                                 | VEP                 |
| Frameshift                  | binary  | Presence of a frameshift variant                                                                                       | VEP                 |
| Stop                        | binary  | Presence of a start or stop lost or stop gained variant                                                                | VEP                 |
| TSS non-coding              | binary  | Presence of a rare, non-coding <sup>†</sup> SNV or indel between -250 and 750 bp from the TSS                          | VEP                 |
| Top 1% conserved non-coding | binary  | Presence of a rare, non-coding <sup>†</sup> SNV or indel with a CADD or PhyloP score in the top 1% of all variants     | VEP                 |
| Coding                      | binary  | Presence of a rare missense, synonymous, stop retained, inframe deletion, inframe insertion                            | VEP                 |
| Non-conserved               | binary  | Presence of a rare non-coding <sup>†</sup> and non-conserved SNV or indel (not in the top 1% of CADD or PhyloP scores) | VEP                 |
| Distance to TSS             | integer | Absolute distance (in bp) between the TSS and the closest rare variant                                                 | Gencode v19         |
| Promoter                    | binary  | Presence of a rare SNV or indel within a promoter of any of 19 tissue groups*                                          | Epigenomics Roadmap |
| Enhancer                    | binary  | Presence of a rare SNV or indel within an enhancer of any of 19 tissue groups*                                         | Epigenomics Roadmap |
| TFBS                        | binary  | Presence of a rare SNV or indel within any transcription factor binding site                                           | CADD                |
| CpG                         | numeric | Maximum percent CpG in a +/- 75 bp window over all rare variants                                                       | CADD                |
| CADD                        | numeric | Maximum CADD score (SNVs only)                                                                                         | CADD                |
| PhyloP                      | numeric | Maximum vertebrate PhyloP score                                                                                        | CADD                |
| PhastCons                   | numeric | Maximum vertebrate PhastCons score                                                                                     | CADD                |
| fitCons                     | numeric | Maximum fitCons score                                                                                                  | CADD                |
| GerpN                       | numeric | Maximum neutral Gerp score                                                                                             | CADD                |
| GerpS                       | numeric | Maximum rejected substitution Gerp score                                                                               | CADD                |

\*The tissue groups were selected sets of tissues from the Epigenomics Roadmap project that matched at least one of the 44 GTEx tissues.

<sup>†</sup>Non-coding VEP categories include 3' UTR, 5' UTR, intron, upstream, downstream, intergenic, regulatory region, TFBS, and TFBS ablation.

### Extended Data Table 1. Rare variant features tested for enrichment.



| Gene List Name | Description                                                                               | # Genes | Source                                                                                                      |
|----------------|-------------------------------------------------------------------------------------------|---------|-------------------------------------------------------------------------------------------------------------|
| GWAS           | Genes reported in the GWAS catalog to have an association with a complex trait or disease | 9480    | <a href="http://www.ebi.ac.uk/gwas/">http://www.ebi.ac.uk/gwas/</a>                                         |
| OMIM           | Genes in the OMIM Gene Map that are linked to a disorder with a known molecular cause     | 3576    | <a href="http://www.omim.org/">http://www.omim.org/</a>                                                     |
| OrphaNet       | Genes associated with rare diseases as curated by OrphaNet                                | 3451    | <a href="http://www.orpha.net/">http://www.orpha.net/</a>                                                   |
| ClinVar        | Genes reported in the ClinVar database to have an association with a disease              | 6279    | <a href="http://www.ncbi.nlm.nih.gov/clinvar/">http://www.ncbi.nlm.nih.gov/clinvar/</a>                     |
| ACMG           | Genes covered by the ACMG guidelines for incidental findings                              | 58      | <a href="http://www.ncbi.nlm.nih.gov/clinvar/docs/acmg/">http://www.ncbi.nlm.nih.gov/clinvar/docs/acmg/</a> |
| Cardio         | Heritable cardiovascular disease genes                                                    | 86      | See Online Methods                                                                                          |
| Cancer         | Genes implicated in heritable cancer predisposition                                       | 55      | See Online Methods                                                                                          |
| LOF-intolerant | Genes in the ExAC database with a pLI score > 0.9                                         | 3230    | <a href="http://www.exac.broadinstitute.org/">http://www.exac.broadinstitute.org/</a>                       |

**Extended Data Table 2. Disease gene sets tested for enrichment among genes with outliers.**

| Annotation                | # | Type           | Description                                                                                        | Category           | Source |
|---------------------------|---|----------------|----------------------------------------------------------------------------------------------------|--------------------|--------|
| Noncoding transcript exon | 2 | binary/integer | Presence/number of rare noncoding transcript exon SNVs                                             | VEP                | VEP    |
| 5 prime UTR               | 2 | binary/integer | Presence/number of rare 5' UTR SNVs                                                                | VEP                | VEP    |
| Splice region             | 2 | binary/integer | Presence/number of rare splice region SNVs                                                         | VEP                | VEP    |
| Noncoding transcript      | 2 | binary/integer | Presence/number of rare noncoding transcript SNVs                                                  | VEP                | VEP    |
| Missense                  | 2 | binary/integer | Presence/number of rare missense SNVs                                                              | VEP                | VEP    |
| Stop gained               | 2 | binary/integer | Presence/number of rare stop gained SNVs                                                           | VEP                | VEP    |
| Splice donor              | 2 | binary/integer | Presence/number of rare splice donor SNVs                                                          | VEP                | VEP    |
| 3 prime UTR               | 2 | binary/integer | Presence/number of rare 3' UTR SNVs                                                                | VEP                | VEP    |
| NMD transcript            | 2 | binary/integer | Presence/number of rare NMD transcript SNVs                                                        | VEP                | VEP    |
| Downstream                | 2 | binary/integer | Presence/number of rare downstream gene SNVs                                                       | VEP                | VEP    |
| Synonymous                | 2 | binary/integer | Presence/number of rare synonymous SNVs                                                            | VEP                | VEP    |
| Upstream                  | 2 | binary/integer | Presence/number of rare upstream gene SNVs                                                         | VEP                | VEP    |
| Splice acceptor           | 2 | binary/integer | Presence/number of rare splice acceptor SNVs                                                       | VEP                | VEP    |
| Intron                    | 2 | binary/integer | Presence/number of rare intron SNVs                                                                | VEP                | VEP    |
| Start lost                | 2 | binary/integer | Presence/number of rare start lost SNVs                                                            | VEP                | VEP    |
| Stop retained             | 2 | binary/integer | Presence/number of rare stop retained SNVs                                                         | VEP                | VEP    |
| Coding sequence           | 2 | binary/integer | Presence/number of coding sequence SNVs                                                            | VEP                | VEP    |
| Stop lost                 | 2 | binary/integer | Presence/number of a stop lost SNVs                                                                | VEP                | VEP    |
| TSS                       | 1 | integer        | Number of rare SNVs in TSS Segway segmentation                                                     | Segway             | CADD   |
| Gene end                  | 1 | integer        | Number in GE0, GE1, and GE2 Segway segmentation                                                    | Segway             | CADD   |
| Dead                      | 1 | integer        | Number in D Segway segmentation                                                                    | Segway             | CADD   |
| Transcription             | 1 | integer        | Number in TF0, TF1, and TF2 Segway segmentation                                                    | Segway             | CADD   |
| Gene start                | 1 | integer        | Number in GS Segway segmentation                                                                   | Segway             | CADD   |
| H3K9me1                   | 1 | integer        | Number in H3K9me1 Segway segmentation                                                              | Segway             | CADD   |
| CTCF                      | 1 | integer        | Number in C0 Segway segmentation                                                                   | Segway             | CADD   |
| Low                       | 1 | integer        | Number in L0 and L1 Segway segmentation                                                            | Segway             | CADD   |
| Enhancer                  | 1 | integer        | Number in E/GM Segway segmentation                                                                 | Segway             | CADD   |
| Faire                     | 1 | integer        | Number in F0 and F1 Segway segmentation                                                            | Segway             | CADD   |
| Repressed                 | 1 | integer        | Number in R0, R1, R2, R3, R4, and R5 Segway segmentation                                           | Segway             | CADD   |
| Gene middle               | 1 | integer        | Number in GM0 and GM1 Segway segmentation                                                          | Segway             | CADD   |
| Active TSS                | 1 | numeric        | Proportion of 127 cell types in state "TSS" (maximum across rare SNVs)                             | ChromHMM (Roadmap) | CADD   |
| Strong transcription      | 1 | numeric        | Proportion of 127 cell types in state "Tx" (maximum)                                               | ChromHMM (Roadmap) | CADD   |
| Bivalent/poised TSS       | 1 | numeric        | Proportion of 127 cell types in state "TssBiv" (maximum)                                           | ChromHMM (Roadmap) | CADD   |
| Heterochromatin           | 1 | numeric        | Proportion of 127 cell types in state "Het" (maximum)                                              | ChromHMM (Roadmap) | CADD   |
| Flanking bivalent TSS/Enh | 1 | numeric        | Proportion of 127 cell types in state "BivFlnk" (maximum)                                          | ChromHMM (Roadmap) | CADD   |
| Flanking active TSS       | 1 | numeric        | Proportion of 127 cell types in state "TssAFlnk" (maximum)                                         | ChromHMM (Roadmap) | CADD   |
| Genic enhancer            | 1 | numeric        | Proportion of 127 cell types in state "EnhG" (maximum)                                             | ChromHMM (Roadmap) | CADD   |
| ZNF genes/Repeats         | 1 | numeric        | Proportion of 127 cell types in state "ZNF/Rpts" (maximum)                                         | ChromHMM (Roadmap) | CADD   |
| Bivalent enhancer         | 1 | numeric        | Proportion of 127 cell types in state "EnhBiv" (maximum)                                           | ChromHMM (Roadmap) | CADD   |
| Repressed polycomb        | 1 | numeric        | Proportion of 127 cell types in state "ReprPC" (maximum)                                           | ChromHMM (Roadmap) | CADD   |
| Flanking transcription    | 1 | numeric        | Proportion of 127 cell types in state "TxFlnk" (maximum)                                           | ChromHMM (Roadmap) | CADD   |
| Weak transcription        | 1 | numeric        | Proportion of 127 cell types in state "TxWk" (maximum)                                             | ChromHMM (Roadmap) | CADD   |
| Quiescent/Low Enhancer    | 1 | numeric        | Proportion of 127 cell types in state "Quies" (maximum)                                            | ChromHMM (Roadmap) | CADD   |
| Weak repressed polycomb   | 1 | numeric        | Proportion of 127 cell types in state "Enh" (maximum)                                              | ChromHMM (Roadmap) | CADD   |
| Active promoter           | 1 | integer        | Number of rare SNVs in active promoter state in NA12878                                            | ChromHMM (Encode)  | ENCODE |
| Transcription             | 1 | integer        | Number of rare SNVs in transcriptional transition and transcriptional elongation states in NA12878 | ChromHMM (Encode)  | ENCODE |
| Poised promoter           | 1 | integer        | Number of rare SNVs in inactive/poised promoter state in NA12878                                   | ChromHMM (Encode)  | ENCODE |
| Low                       | 1 | integer        | Number of rare SNVs in heterochromatin/low signal state in NA12878                                 | ChromHMM (Encode)  | ENCODE |
| Weak promoter             | 1 | integer        | Number of rare SNVs in weak promoter state in NA12878                                              | ChromHMM (Encode)  | ENCODE |
| Weak transcription        | 1 | integer        | Number of rare SNVs in weakly transcribed region state in NA12878                                  | ChromHMM (Encode)  | ENCODE |

|                     |   |         |                                                                                                                   |                     |         |
|---------------------|---|---------|-------------------------------------------------------------------------------------------------------------------|---------------------|---------|
| Insulator           | 1 | integer | Number of rare SNVs in insulator state in NA12878                                                                 | ChromHMM (Encode)   | ENCODE  |
| Weak enhancer       | 1 | integer | Number of rare SNVs in two weak/poised enhancer states in NA12878                                                 | ChromHMM (Encode)   | ENCODE  |
| Repressed           | 1 | integer | Number of rare SNVs in two repetitive/copy number variation states in NA12878                                     | ChromHMM (Encode)   | ENCODE  |
| Strong enhancer     | 1 | integer | Number of rare SNVs in two strong enhancer states in NA12878                                                      | ChromHMM (Encode)   | ENCODE  |
| PolII               | 2 | numeric | Maximum PHRED-scale <i>P</i> -value/peak signal of polII evidence for open chromatin (across rare SNVs)           | Open chromatin/TFBS | CADD    |
| TFBS                | 1 | integer | Number of overlapping TFBS from ChIP-seq (maximum across rare SNVs)                                               | Open chromatin/TFBS | CADD    |
| TFBSPeaks           | 1 | Integer | Number of overlapping TFBS peaks from ChIP-seq summed over different cell types/tissue (maximum across rare SNVs) | Open chromatin/TFBS | CADD    |
| TFBSPeaksMax        | 1 | Integer | Number of maximum values of overlapping ChIP TFBS peaks across cell types/tissue (maximum across rare SNVs)       | Open chromatin/TFBS | CADD    |
| Combined pvalue     | 1 | numeric | Maximum ENCODE combined PHRED-scale <i>P</i> -value of Faire, Dnase, polII, CTCF, Myc evidence for open chromatin | Open chromatin/TFBS | CADD    |
| Dnase               | 2 | numeric | Maximum PHRED-scale <i>P</i> -value/peak signal of Dnase evidence for open chromatin                              | Open chromatin/TFBS | CADD    |
| Faire               | 2 | numeric | Maximum PHRED-scale <i>P</i> -value/peak signal of Faire evidence for open chromatin                              | Open chromatin/TFBS | CADD    |
| Myc                 | 2 | numeric | Maximum PHRED-scale <i>P</i> -value/peak signal of Myc evidence for open chromatin                                | Open chromatin/TFBS | CADD    |
| H3K4Me3             | 1 | numeric | Maximum ENCODE H3K4 trimethylation level                                                                          | Open chromatin/TFBS | CADD    |
| CTCF                | 2 | numeric | Maximum PHRED-scale <i>P</i> -value/peak of CTCF evidence for open chromatin                                      | Open chromatin/TFBS | CADD    |
| H3K27Ac             | 1 | numeric | Maximum ENCODE H3K27 acetylation level                                                                            | Open chromatin/TFBS | CADD    |
| Nucleosome position | 1 | numeric | Maximum ENCODE Nucleosome position track score                                                                    | Open chromatin/TFBS | CADD    |
| H3K4Me1             | 1 | numeric | Maximum ENCODE H3K4 methylation level                                                                             | Open chromatin/TFBS | CADD    |
| CADD                | 1 | numeric | Maximum PHRED-scale CADD score                                                                                    | DNA/Summary         | CADD    |
| CpG                 | 1 | numeric | Maximum percent CpG in a window of +/- 75bp                                                                       | DNA/Summary         | CADD    |
| GC                  | 1 | numeric | Maximum percent GC in a window of +/- 75bp                                                                        | DNA/Summary         | CADD    |
| DANN                | 1 | numeric | Maximum DANN score                                                                                                | DNA/Summary         | DANN    |
| Distance to TSS     | 1 | integer | Absolute distance (in bp) between the TSS and the closest rare SNV                                                | DNA/Summary         | Gencode |
| fitCons             | 1 | numeric | Maximum fitCons score                                                                                             | DNA/Summary         | CADD    |
| DNA MGW             | 1 | numeric | Maximum predicted local DNA structure effect on dnaMGW                                                            | DNA/Summary         | CADD    |
| Variant counts      | 1 | numeric | Total number of rare SNVs                                                                                         | DNA/Summary         | GTE     |
| DNA Roll            | 1 | numeric | Maximum predicted local DNA structure effect on dnaRoll                                                           | DNA/Summary         | CADD    |
| DNA HelT            | 1 | numeric | Maximum predicted local DNA structure effect on dnaHelT                                                           | DNA/Summary         | CADD    |
| DNA ProT            | 1 | numeric | Maximum predicted local DNA structure effect on dnaProT                                                           | DNA/Summary         | CADD    |
| PhyloP              | 3 | numeric | Maximum primate, mammalian, and vertebrate PhyloP conservation scores                                             | Conservation        | CADD    |
| PhastCons           | 3 | numeric | Maximum primate, mammalian, and vertebrate PhastCons conservation scores                                          | Conservation        | CADD    |
| GerpS               | 1 | numeric | Maximum rejected substitution score defined by GERP++                                                             | Conservation        | CADD    |
| GerpN               | 1 | numeric | Maximum neutral evolution score defined by GERP++                                                                 | Conservation        | CADD    |

**Extended Data Table 3. Genomic annotations used for RIVER.** All annotations are across rare SNVs within 10 kb of the gene's TSS.

| Genomic feature   | Log odds ratio of an outlier status from one individual | <i>P</i> -value       |
|-------------------|---------------------------------------------------------|-----------------------|
| DANN              | 2.79                                                    | $5.7 \times 10^{-30}$ |
| CADD              | 2.78                                                    | $1.2 \times 10^{-29}$ |
| Logistic          | 2.72                                                    | $2.2 \times 10^{-27}$ |
| Vertebrate PhyloP | 2.74                                                    | $1.5 \times 10^{-28}$ |
| TFBS              | 2.77                                                    | $1.2 \times 10^{-29}$ |

**Extended Data Table 4. Assessment of the advantage of incorporating gene expression with genomic annotations by simplified, supervised models of outlier status.**

| Gene     | Variant ID                | P(FR G) | P(FR G,E) | Median Z-score | Clinical significance   | Disease                                                                                                      | Molecular Consequence |
|----------|---------------------------|---------|-----------|----------------|-------------------------|--------------------------------------------------------------------------------------------------------------|-----------------------|
| SBDS     | rs113993991* <sup>†</sup> | 0.447   | 0.985     | -5.337         | pathogenic              | Shwachman syndrome                                                                                           | nonsense              |
| TPP1     | rs119455955*              | 0.619   | 0.995     | -4.110         | pathogenic              | Ceroid lipofuscinosis neuronal 2, Neuronal ceroid lipofuscinosis, Inborn genetic diseases                    | nonsense              |
| GAMT     | rs80338735* <sup>†</sup>  | 0.162   | 0.929     | -2.813         | pathogenic              | Deficiency of guanidinoacetate methyltransferase                                                             | synonymous            |
| SBDS     | rs113993993* <sup>†</sup> | 0.526   | 0.989     | -2.753         | pathogenic, risk factor | Shwachman syndrome, susceptibility to aplastic anemia                                                        | splice donor          |
| OGG1     | rs104893751               | 0.213   | 0.963     | -2.733         | pathogenic              | Clear cell carcinoma of kidney                                                                               | missense              |
| BBS2     | rs121908176*              | 0.519   | 0.992     | -2.560         | pathogenic              | Bardet-Biedl syndrome 2                                                                                      | nonsense              |
| SBDS     | rs113993993* <sup>†</sup> | 0.520   | 0.988     | -2.301         | pathogenic, risk factor | Shwachman syndrome, susceptibility to aplastic anemia                                                        | splice donor          |
| NAGA     | rs121434529               | 0.047   | 0.563     | -1.663         | pathogenic              | Schindler disease, type 1                                                                                    | missense              |
| OGG1     | rs104893751               | 0.213   | 0.239     | -1.231         | pathogenic              | Clear cell carcinoma of kidney                                                                               | missense              |
| SLC25A11 | rs140547520               | 0.009   | 0.004     | -0.700         | pathogenic              | Amyotrophic lateral sclerosis 18                                                                             | missense              |
| DSTYK    | rs200780796               | 0.077   | 0.049     | -0.694         | risk factor             | Susceptibility to congenital anomalies of the kidney and urinary tract 1                                     | missense              |
| CLPTM1   | rs120074114               | 0.027   | 0.006     | -0.660         | pathogenic              | Apolipoprotein c-ii variant                                                                                  | missense              |
| MUTYH    | rs34612342                | 0.078   | 0.038     | 0.650          | pathogenic              | Endometrial carcinoma, MYH-associated polyposis, Carcinoma of colon, Hereditary cancer-predisposing syndrome | missense              |
| IVD      | rs28940889                | 0.074   | 0.045     | 0.573          | pathogenic              | Isovaleryl-CoA dehydrogenase deficiency                                                                      | missense              |
| GPR97    | rs121908464               | 0.025   | 0.009     | 0.508          | pathogenic              | Bilateral frontoparietal polymicrogyria                                                                      | missense              |
| ZNF200   | rs61732874                | 0.017   | 0.003     | -0.431         | pathogenic, likely      | Familial Mediterranean fever                                                                                 | missense, 3' UTR      |
| APOC4    | rs120074114               | 0.038   | 0.012     | 0.411          | pathogenic              | Apolipoprotein c-ii variant                                                                                  | missense              |
| SLC7A9   | rs79389353                | 0.044   | 0.014     | -0.375         | pathogenic, likely      | Cystinuria                                                                                                   | missense              |
| RPL29    | rs121912698               | 0.023   | 0.008     | -0.371         | pathogenic              | Aminoacylase 1 deficiency                                                                                    | missense              |
| RPS19    | rs147508369               | 0.018   | 0.013     | 0.304          | pathogenic              | Diamond-Blackfan anemia 1                                                                                    | missense              |
| ABHD14B  | rs121912698               | 0.035   | 0.011     | 0.224          | pathogenic              | Aminoacylase 1 deficiency                                                                                    | missense              |
| ZNF200   | rs104895091               | 0.022   | 0.005     | 0.218          | pathogenic              | Autosomal dominant familial Mediterranean fever                                                              | Inframe, 3' UTR       |
| ABHD14B  | rs121912701               | 0.020   | 0.004     | 0.206          | pathogenic              | Aminoacylase 1 deficiency                                                                                    | missense              |
| ZNF200   | rs28940579                | 0.025   | 0.006     | 0.175          | pathogenic              | Familial Mediterranean fever                                                                                 | missense, 3' UTR      |
| RPL29    | rs121912698               | 0.036   | 0.012     | 0.153          | pathogenic              | Aminoacylase 1 deficiency                                                                                    | missense              |
| RPL29    | rs121912701               | 0.021   | 0.005     | 0.142          | pathogenic              | Aminoacylase 1 deficiency                                                                                    | missense              |
| ABHD14B  | rs121912698               | 0.035   | 0.011     | 0.025          | pathogenic              | Aminoacylase 1 deficiency                                                                                    | missense              |

\* Regulatory pathogenic variant.

<sup>†</sup> Mentioned in the main text.

**Extended Data Table 5. 27 GTEx rare SNVs reported as disease variants in ClinVar.**

| Parameter                                          | Initialization | Spearman $\rho$ | Accuracy |
|----------------------------------------------------|----------------|-----------------|----------|
| $\beta$                                            | 10% noise      | > .999          | 0.880    |
|                                                    | 25% noise      | > .999          | 0.862    |
|                                                    | 50% noise      | > .999          | 0.849    |
|                                                    | 100% noise     | > .999          | 0.848    |
|                                                    | 200% noise     | > .999          | 0.843    |
|                                                    | 400% noise     | > .999          | 0.846    |
|                                                    | 800% noise     | > .999          | 0.846    |
| $\theta$ [ $P(E = 0 FR = 1)$ , $P(E = 1 FR = 1)$ ] | [0.1, 0.9]     | > .999          | 0.841    |
|                                                    | [0.4, 0.6]     | > .999          | 1.000    |
|                                                    | [0.45, 0.55]   | > .999          | 1.000    |

**Extended Data Table 6. Stability analysis of estimated parameters with different parameter initializations.**
